# Supplementary material
Source: PubMed Central journal article supplement (PMC2868273)

1  
2  
3  
4  
5  
6  
7  
8  
9  
10  
11  
12  
13  
14  
15  
16  
17  
18  
19  
20  
21  
22  
23  
24  
25  
26  
27  
28  
29  
30  
31  
32

**ONLINE REPOSITORY**

Immunologic Features of Infants with Milk or Egg Allergy Enrolled  
in an Observational Study (CoFAR) of Food Allergy

Scott H. Sicherer, MD\*  
Robert A. Wood, MD<sup>¥</sup>  
Donald Stablein, PhD<sup>‡</sup>  
A. Wesley Burks, MD\*\*  
Andrew H. Liu, MD<sup>£</sup>  
Stacie M. Jones, MD\*\*\*  
David M. Fleischer, MD<sup>£</sup>  
Donald YM Leung, MD, PhD<sup>£</sup>  
Alexander Grishin, PhD\*  
Lloyd Mayer, MD\*  
Wayne Shreffler, MD, PhD\*  
Robert Lindblad, MD<sup>‡</sup>  
Hugh A. Sampson, MD\*

\*Jaffe Food Allergy Institute, Mount Sinai School of Medicine, New York; <sup>¥</sup>Johns Hopkins University School of Medicine, Baltimore, MD; <sup>‡</sup>The EMMES Corporation, Rockville MD; \*\*Duke University Medical Center, Durham, NC; <sup>£</sup>National Jewish Health, Denver, CO; \*\*\*University of Arkansas for Medical Sciences, Little Rock, AR.

Corresponding Author (and reprint requests): Scott H. Sicherer, MD, Division of Allergy/Immunology, Mount Sinai Hospital, Box 1198, One Gustave L. Levy Place, New York, New York 10029-6574. Voice: (212) 241-5548; FAX: (212) 426-1902; E-mail: scott.sicherer@mssm.edu

33

34 *Definition of Atopic Diseases*

35 Atopic disease history in parents and siblings of enrolled infants was based upon previously  
36 accepted definitions.<sup>(1)</sup> A diagnosis of asthma was defined by a minimum of 3 reported  
37 episodes (history) of wheezing in addition to respiratory symptoms with response to beta  
38 agonists or signs of airway hyperreactivity (wheezing or severe coughing while exercising, cold  
39 weather, or disturbed coughing at night) without ongoing upper respiratory infection. Atopic  
40 dermatitis required<sup>(2;3)</sup> pruritus and an eczematous rash (acute, subacute, chronic) with typical  
41 morphology and age specific patterns and a chronic (3 or more weeks) or relapsing history  
42 (excluding scabies, seborrheic dermatitis, allergic contact dermatitis, ichthyoses, cutaneous  
43 lymphoma, psoriasis, and immune deficiency disease) and atopy (personal and/or family  
44 history or IgE reactivity) and xerosis. A family history of food allergy required typical symptoms  
45 such as urticaria, angioedema, or asthma, directly following consumption of the food.

46

47 For enrolled infants, asthma is graded by severity according to NHLBI guidelines and atopic  
48 dermatitis severity is graded by criteria previously described and published by Rajka and  
49 Langeland.<sup>(3)</sup> Briefly, the AD severity is graded as mild, moderate, or severe using the  
50 following parameters to compute a score summation: 1) extent of disease (by “rule of nine”), 2)  
51 course of disease (by history), and 3) intensity of disease (disturbance of night’s sleep by  
52 itching) each on a 3 point scale. Summation scores of 3–4 indicate mild disease, 5–7  
53 moderate disease, and 8–9 severe atopic dermatitis. To avoid exclusion of milk or egg  
54 sensitized children who experienced improvement of atopic dermatitis by ongoing milk or egg  
55 restriction prior to consideration for enrollment, a historical grading of AD severity prior to  
56 dietary manipulation (change of formula or maternal exclusion of milk or egg) was allowed.

57

58 *Categorization of food allergy*

59 Because this is an observational study, repeated diagnostic oral food challenges could not be  
60 imposed upon infants at enrollment. Therefore, the following categorization scheme was  
61 developed and designed for longitudinal use.

62

63 At enrollment (and for the longitudinal course of the study) we define food allergy according to  
64 clinical history and test results, as well as by oral food challenges when clinically indicated. A

65 clinical history was considered **convincing** when there were symptoms within an hour of  
66 isolated ingestion that included at least: urticaria and/or angioedema, difficulty breathing,  
67 wheezing, throat tightness, and/or vomiting. Brief ingestion of cow's milk protein formula  
68 during the newborn period does not qualify as evidence of tolerance.

69  
70 Based upon available studies for children under age 2 years, we considered food-specific IgE  
71 levels to have diagnostic accuracy of >95% when they were equal to or greater than 5 kU<sub>A</sub>/L  
72 for milk<sup>(4)</sup>, 2 kU<sub>A</sub>/L for egg,<sup>(5)</sup> and 5 kU<sub>A</sub>/L for peanut (see below).

73  
74 We developed a novel classification scheme to categorize each study subject into one of the  
75 following food allergy diagnostic categories based upon the clinical history and standard IgE  
76 levels:

77  
78 **Confirmed IgE mediated reaction (~97% certainty)**: A positive physician-supervised oral  
79 food challenge and sensitization to the food (food-specific IgE  $\geq$  0.35 kU<sub>A</sub>/L and/or PST  $\geq$  3  
80 mm) and/or a convincing reaction plus a >95% predictive food-specific IgE test result.

81  
82 **Convincing, but not confirmed IgE mediated reaction (~95% accurate)**: a convincing  
83 history with sensitization demonstrated by a positive serologic test (milk or egg  $\geq$  0.35 but <  
84 95% predictive levels) and/or a positive skin test; or history of flare of atopic dermatitis upon  
85 ingestion of the food AND food-specific plasma IgE > 95% predictive level.

86  
87 **Serological diagnosis**: a food-specific IgE test result that is >95% predictive of a clinical  
88 reaction but no ingestion of the food. Based upon available studies for children under age 2  
89 years, we considered food-specific IgE levels to have diagnostic accuracy of >95% when they  
90 were equal to or greater than 5 kU<sub>A</sub>/L for milk<sup>(4)</sup>, 2 kU<sub>A</sub>/L for egg,<sup>(5)</sup> and 5 kU<sub>A</sub>/L for peanut.  
91 The predictive value for peanut is derived. Oral food challenges are not typically performed to  
92 peanut in this age group and therefore diagnostic properties of the test have not been  
93 determined in infants.<sup>(6;7)</sup> The predictive value of serum IgE for clinical reactions varies by age,  
94 with younger infants reacting at lower levels than school-age children. For example, previous  
95 studies of egg and milk allergy in infants<sup>(4;5;8)</sup> indicate that >95% react at IgE levels to egg and

96 milk that correspond to 50% reaction rates for 5-7 year olds (e.g., a level of 2 kU<sub>A</sub>/L for egg  
97 and milk).<sup>(7)</sup> In studies of children at mean ages of 5-7 years,<sup>(6;7;9)</sup> a level of 5 kU<sub>A</sub>/L to peanut  
98 is associated with a 70-90% clinical reaction rate. Based upon these studies of peanut, and  
99 studies on egg and milk showing that infants react at lower food-specific IgE levels than older  
100 children, we estimate that a peanut IgE level of  $\geq 5$  kU<sub>A</sub>/L in the infants in this study would  
101 indicate a high (>95%) likelihood of current clinical peanut allergy. Based upon the above-  
102 referenced studies,<sup>(6;7;9)</sup> co-incident soy allergy affecting a small percent of peanut-allergic  
103 children, would not likely influence these predictive values.

104

105 **Potential allergy:** no ingestion and an indeterminate positive test result, or a convincing  
106 history but no sensitization, or there was a flare of atopic dermatitis and sensitization to the  
107 food (but the food-specific IgE is not in diagnostic range).

108

109 **Not allergic-sensitized:** detectable IgE antibody (sensitized, IgE  $\geq 0.35$  kU<sub>A</sub>/L or PST  $\geq 3$   
110 mm) but tolerates eating the food.

111

112 **Not allergic- not sensitized:** No evidence of IgE antibody to the food and food tolerant.

113

114 **Not sensitized-never ingested:** tested negative and has not ingested the food (does not  
115 include exposure to allergen in breast milk).

116

117 **Non-IgE food allergy:** a positive oral food challenge but not sensitized (serum IgE < 0.35  
118 kU<sub>A</sub>/L and PST < 3 mm).

119

120 As described in the manuscript, we only evaluated mononuclear cell expression of key  
121 cytokine and regulatory genes for the clinical endpoints associated with allergy  
122 (confirmed/convincing) or no allergy categories.

123

124 *Skin tests*

125 A positive PST is defined by a mean wheal diameter of 3 mm or greater, after subtraction of  
126 the saline control. Tests were considered reliable if the wheal size of the histamine control was

127 at least 3 mm larger than the wheal size of the negative control. All sites used the same lot of  
128 reagents and training was performed to ensure consistency. The following extracts were used  
129 (Greer catalog number in parentheses, Lenoir, NC): cow milk (F293), chicken egg white  
130 (F272), and peanut (F171). For additional allergic characterization, PSTs were performed with  
131 environmental allergens: standardized cat (TE3), dog epithelia (*Canis familiaris*; mixed breed)  
132 (E7), *Dermatophagoides pteronyssinus* (B70), *Dermatophagoides farinae* (B64), mold mix #1  
133 (*alternaria*, *aspergillus*, *helminthosporium*, *cladosporium*, *penicillium*) (MO1), and cockroach mix  
134 (American German) (B012). Skin tests to a specific agent could be deferred if the infant  
135 experienced an unequivocal recent episode of anaphylaxis to the substance.

136

## 137 ADDITIONAL RESULTS

138

### 139 *Additional Demographic Features*

140

141

142 The number of children enrolled at each site were: Denver, CO (99), Durham, NC (103),  
143 Baltimore, MD (109), New York, NY (107) and Little Rock, AR (94). Of the mothers, 79.1%  
144 had a college degree or higher and among fathers this was 73.0%. Parental atopic disease  
145 was reported among 67.4% of mothers, 59.8% of fathers and 43.6% were families with  
146 biparental atopy. The mean birth weight of participants was 3.42 kg (range 1.16-4.77). Full  
147 term pregnancy ( $\geq 37$  weeks) was reported for 92.4% of the participants, and 13 infants were  
148 born prematurely at  $\leq 34$  weeks. Pets in the household included dogs (24.8% of households)  
149 or cats (13.3%) and 3.1% had both types. Asthma was diagnosed in 28 (5.5%) of the entrants  
150 and when present, was mild-intermittent in 19, mild-persistent in 8 and moderate-persistent in  
151 1. By parental report, 15.2% of the infants had experienced bronchiolitis. The sites were  
152 geographically diverse and distributions of race, ethnicity, household income, parental  
153 education, atopic dermatitis severity and pets in the home, but not gender, differed significantly  
154 ( $p < .001$ ) by site. For some variables, the range of site-specific characteristics was substantial;  
155 for example, the Caucasian race rate ranged from 57.5% to 86.0%, incomes over \$100,000  
156 from 13.8% to 60.8% and pets in the home from 21.5% to 50.5%. **Table E1** shows the  
157 categories of allergy as described above. **Table E2** shows sensitization characteristics.

158

159 *Additional Results and Quality Control Standards for PCR*

160 **Table E3** shows the mean delta Ct and percent of undetectable stimulations. Overall 96.8% of  
161 the PCR passed laboratory quality standards while 12.5% of the assays failed to detect the  
162 targeted gene (5% for anti-CD3/-CD28, 22% for medium). The 5 clinic sites demonstrated the  
163 ability to consistently prepare samples with quality success rates ranging from 95.3 to 97.4 %  
164 and non-detection rates ranging from 10.7- to 16.1%. As expected, CD25 up-regulation  
165 following positive control (anti-CD3/-CD28) and tetanus toxoid was readily detectable by PCR.  
166 Transcriptional changes were also evident upon allergen stimulation for several target genes in  
167 comparison to medium alone. To show quality control, **Figure E2** displays a high correlation of  
168 housekeeping genes and **Figure E3** shows typical consistent results across study sites for a  
169 representative stimulation (peanut stimulated IL4 gene).

170

References

- 171  
172  
173 (1) Kull I, Wickman M, Lilja G, Nordvall SL, Pershagen G. Breast feeding and allergic  
174 diseases in infants-a prospective birth cohort study. *Arch Dis Child* 2002; 87(6):478-81.
- 175 (2) Sampson HA, Scanlon SM. Natural history of food hypersensitivity in children with  
176 atopic dermatitis. *J Pediatr* 1989; 115:23-7.
- 177 (3) Rajka G, Langeland T. Grading of the severity of atopic dermatitis. *Acta Derm Venereol*  
178 *Suppl (Stockh)* 1989; 144:13-4.
- 179 (4) Garcia-Ara C, Boyano-Martinez T, Diaz-Pena JM, Martin-Munoz F, Reche-Frutos M,  
180 Martin-Esteban M. Specific IgE levels in the diagnosis of immediate hypersensitivity to cows' milk  
181 protein in the infant. *J Allergy Clin Immunol* 2001; 107(1):185-90.
- 182 (5) Boyano-Martinez T, Garcia-Ara C, Diaz-Pena JM, Martin-Esteban M. Prediction of  
183 tolerance on the basis of quantification of egg white- specific IgE antibodies in children with egg  
184 allergy. *J Allergy Clin Immunol* 2002; 110(2):304-9.
- 185 (6) Roberts G, Lack G. Diagnosing peanut allergy with skin prick and specific IgE testing. *J*  
186 *Allergy Clin Immunol* 2005; 115(6):1291-6.
- 187 (7) Sampson HA. Utility of food-specific IgE concentrations in predicting symptomatic food  
188 allergy. *J Allergy Clin Immunol* 2001; 107(5):891-6.
- 189 (8) Komata T, Soderstrom L, Borres MP, Tachimoto H, Ebisawa M. The predictive  
190 relationship of food-specific serum IgE concentrations to challenge outcomes for egg and milk varies by  
191 patient age. *J Allergy Clin Immunol* 2007.
- 192 (9) Maloney JM, Rudengren M, Ahlstedt S, Bock SA, Sampson HA. The use of serum-  
193 specific IgE measurements for the diagnosis of peanut, tree nut, and seed allergy. *J Allergy Clin*  
194 *Immunol* 2008; 122(1):145-51.

195

196

197 Table E1. Demographic characteristics of the study participants (n=512 unless otherwise  
 198 noted).

|                                   | N   | %    |
|-----------------------------------|-----|------|
| Male                              | 345 | 67.4 |
| <i>Age (months)at enrollment</i>  |     |      |
| 3-5                               | 65  | 12.7 |
| 6-8                               | 128 | 25.0 |
| 9-11                              | 182 | 35.5 |
| 12-14                             | 137 | 26.8 |
| <i>Race</i>                       |     |      |
| Caucasian                         | 378 | 73.8 |
| Black/African-American            | 79  | 15.4 |
| Asian                             | 40  | 7.8  |
| Other                             | 15  | 2.9  |
| <i>Ethnicity</i>                  |     |      |
| Hispanic or Latino                | 36  | 7.0  |
| <i>Household income</i>           |     |      |
| \$0-\$49,999                      | 86  | 16.8 |
| \$50,000-\$99,999                 | 135 | 26.4 |
| >\$100,000                        | 215 | 42.0 |
| <i>Caeserian section Delivery</i> | 178 | 34.8 |
| <i>Breastfed</i>                  |     |      |
| Never                             | 73  | 14.3 |
| Yes                               | 439 | 85.7 |
| <i>Atopic Dermatitis severity</i> |     |      |
| None                              | 40  | 7.8  |
| Mild                              | 51  | 10.0 |
| Moderate                          | 258 | 50.4 |
| Severe                            | 163 | 31.8 |



Table E2. Sensitization rates (n = 503).

| <b>Sensitization parameter</b>                                                       | <b>Milk</b> | <b>Egg</b> | <b>Peanut</b> |
|--------------------------------------------------------------------------------------|-------------|------------|---------------|
| Positive PST (%)                                                                     | 68.7        | 87.1       | 53.7          |
| IgE $\geq$ 0.35 to 2 kU <sub>A</sub> /L (%)                                          | 22.1        | 23.7       | 20.9          |
| IgE > 2 to 5 kU <sub>A</sub> /L (%)                                                  | 12.7        | 16.1       | 11.9          |
| IgE > 5 kU <sub>A</sub> /L (%)                                                       | 26.6        | 34.6       | 27.8          |
| Positive sensitization by positive PST and/or IgE $\geq$ 0.35 kU <sub>A</sub> /L (%) | 77.7        | 88.7       | 68.8          |
| Mean IgE (kU <sub>A</sub> /L)                                                        | 9.1         | 10.4       | 9.8           |
| 25 <sup>th</sup> Percentile IgE (kU <sub>A</sub> /L)                                 | .1          | .3         | .05           |
| Median IgE (kU <sub>A</sub> /L)                                                      | 0.9         | 2.1        | 0.9           |
| 75 <sup>th</sup> Percentile IgE (kU <sub>A</sub> /L)                                 | 5.5         | 9.5        | 5.9           |

Table E3. Raw data showing Mean Delta Ct by Stimulation and % Undetectable

| Gene  | Stimulant      |          |                |          |                |          |                |          |
|-------|----------------|----------|----------------|----------|----------------|----------|----------------|----------|
|       | Peanut         |          | Medium         |          | aCD3/28        |          | Tetanus        |          |
|       | % Undetectable | Delta CT |
| CD25  | 5.22           | 5.91     | 6.81           | 7.81     | 4.02           | 4.93     | 2.41           | 5.41     |
| CISH  | 11.16          | 7.58     | 39.23          | 11.60    | 6.29           | 7.29     | 9.05           | 7.12     |
| FOXP3 | 9.62           | 7.66     | 12.66          | 8.46     | 6.38           | 7.52     | 11.01          | 7.72     |
| GATA3 | 2.46           | 4.66     | 4.97           | 5.07     | 2.33           | 4.94     | 2.18           | 4.37     |
| IL10  | 35.66          | 12.09    | 60.57          | 14.49    | 14.03          | 11.84    | 39.37          | 12.40    |
| IL4   | 36.50          | 12.48    | 59.45          | 14.36    | 11.48          | 11.37    | 20.32          | 9.99     |
| INFG  | 21.66          | 9.17     | 38.63          | 12.60    | 5.93           | 5.47     | 4.80           | 6.10     |
| RPL41 | 0.00           | -1.72    | 0.00           | -1.67    | 0.00           | -1.80    | 0.00           | -1.77    |
| RPS9  | 0.00           | 0.00     | 0.00           | 0.00     | 0.00           | 0.00     | 0.00           | 0.00     |
| TBET  | 9.43           | 8.57     | 12.87          | 10.32    | 2.34           | 6.48     | 7.41           | 8.03     |

| Gene  | Stimulant      |          |                |          |                |          |
|-------|----------------|----------|----------------|----------|----------------|----------|
|       | Caseins        |          | Egg White      |          | All            |          |
|       | % Undetectable | Delta CT | % Undetectable | Delta CT | % Undetectable | Delta CT |
| CD25  | 6.57           | 5.57     | 4.77           | 5.89     | 4.96           | 5.93     |
| CISH  | 10.60          | 7.11     | 15.44          | 7.78     | 15.23          | 8.08     |
| FOXP3 | 11.94          | 7.03     | 12.29          | 7.59     | 10.60          | 7.68     |
| GATA3 | 2.33           | 4.07     | 1.65           | 4.27     | 2.69           | 4.58     |
| IL10  | 29.19          | 10.53    | 53.14          | 13.33    | 38.25          | 12.45    |
| IL4   | 35.59          | 11.60    | 44.67          | 12.61    | 34.37          | 12.06    |
| INFG  | 17.65          | 8.04     | 11.99          | 8.08     | 16.87          | 8.25     |
| RPL41 | 0.00           | -1.85    | 0.00           | -1.80    | 0.00           | -1.77    |
| RPS9  | 0.00           | 0.00     | 0.00           | 0.00     | 0.00           | 0.00     |
| TBET  | 18.81          | 10.14    | 9.57           | 9.00     | 9.93           | 8.73     |

202 Figure Legends.

203

204 Figure E1a-c. Relationship of skin test wheal sizes (mm) to serum IgE antibody levels ( $kU_A/L$ )  
205 for milk (1a), egg (1b) and peanut (1c) shown on a logarithmic scale. Spearman correlation  
206 coefficients are 0.64 for milk, 0.65 for egg and peanut. "+" symbols refer to those with  
207 confirmed/convincing milk/egg allergy; Spearman correlation coefficients are 0.47 for milk and  
208 0.48 for egg,  $p < 0.001$  for this subgroup. PSTs were recorded as negative if the saline control  
209 wheal was larger than the food test wheal.

210

211 Figure E2. Reproducibility of replicate PCR: Correlation of two housekeeping genes threshold  
212 cycle number from 2,708 PCR assays, using 5 stimulation conditions. Spearman correlation  
213 coefficient = 0.84.

214

215 Figure E3. Reproducibility across study sites: The 5 participating sites (DC-National  
216 Jewish Health, Denver, CO, DU-Duke, Durham, NC, JH-Johns Hopkins, Baltimore, MD, MS-  
217 Mount Sinai, NY, NY and UA- University of Arkansas, Little Rock, AR) prepared stimulated  
218 lymphocytes that were shipped to a central laboratory for qPCR analysis. The site specific  
219 results for the peanut stimulated IL4 gene Delta-Delta Ct are shown (N ranges from 77-91 per  
220 site; there was no significant difference between sites for the detection of IL4,  $p=0.32$ ).

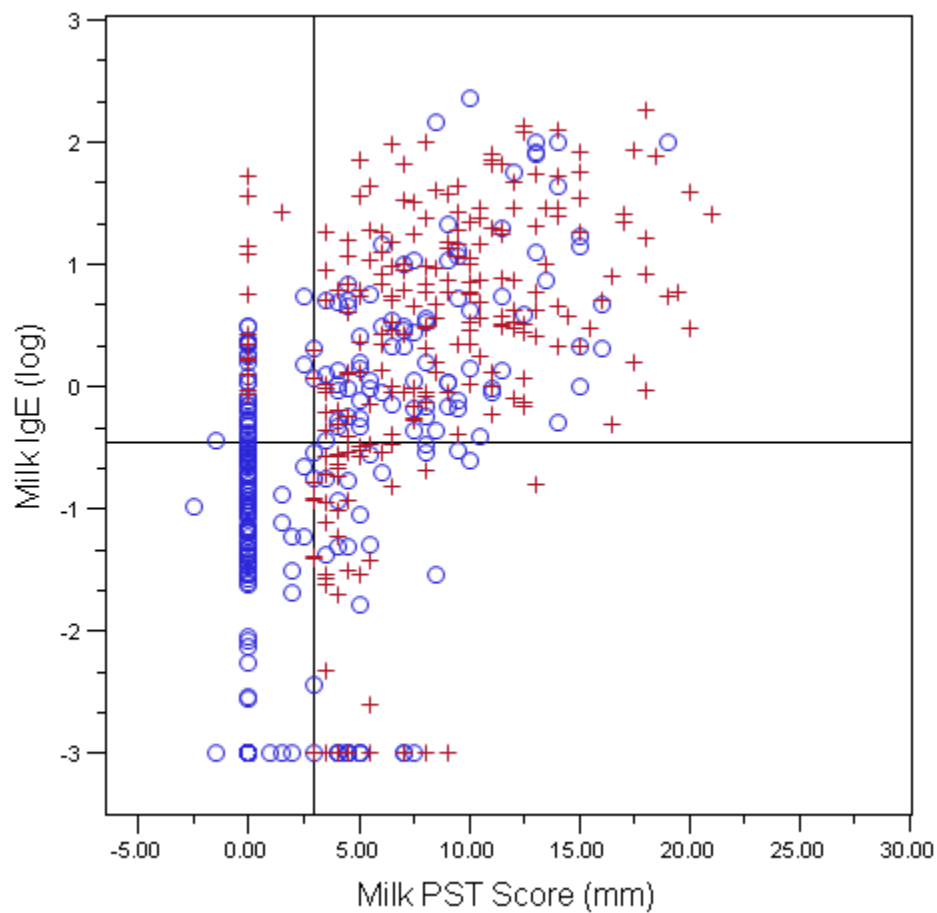

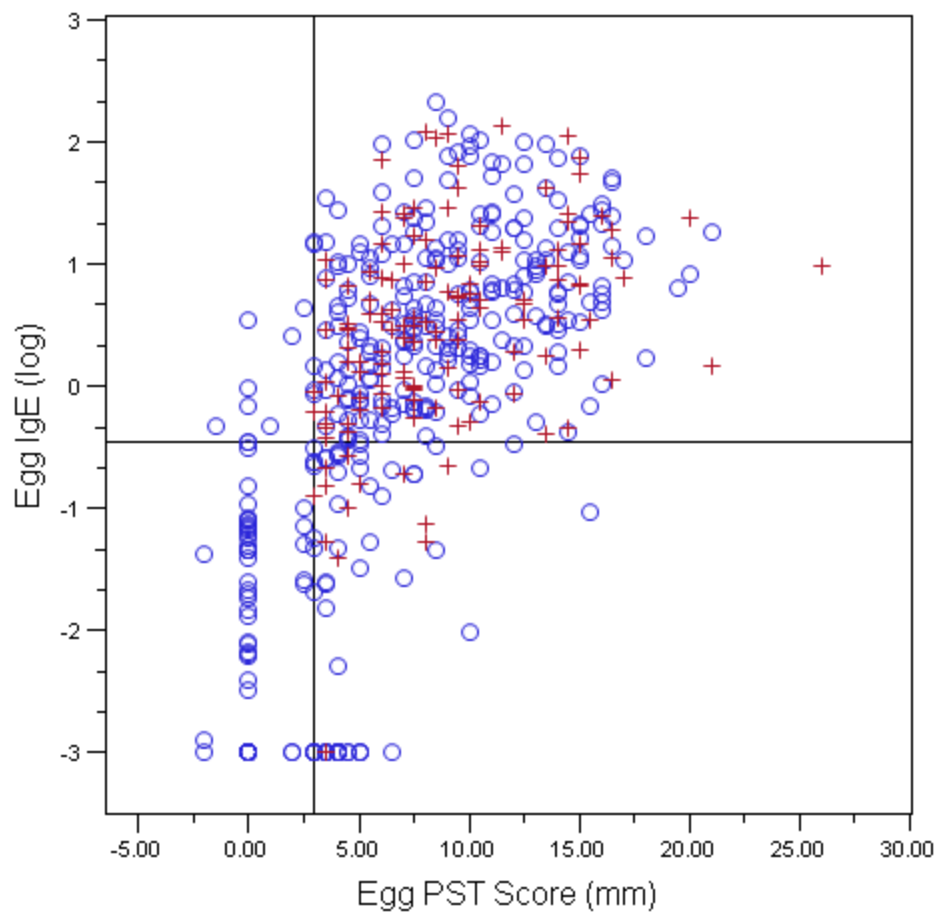

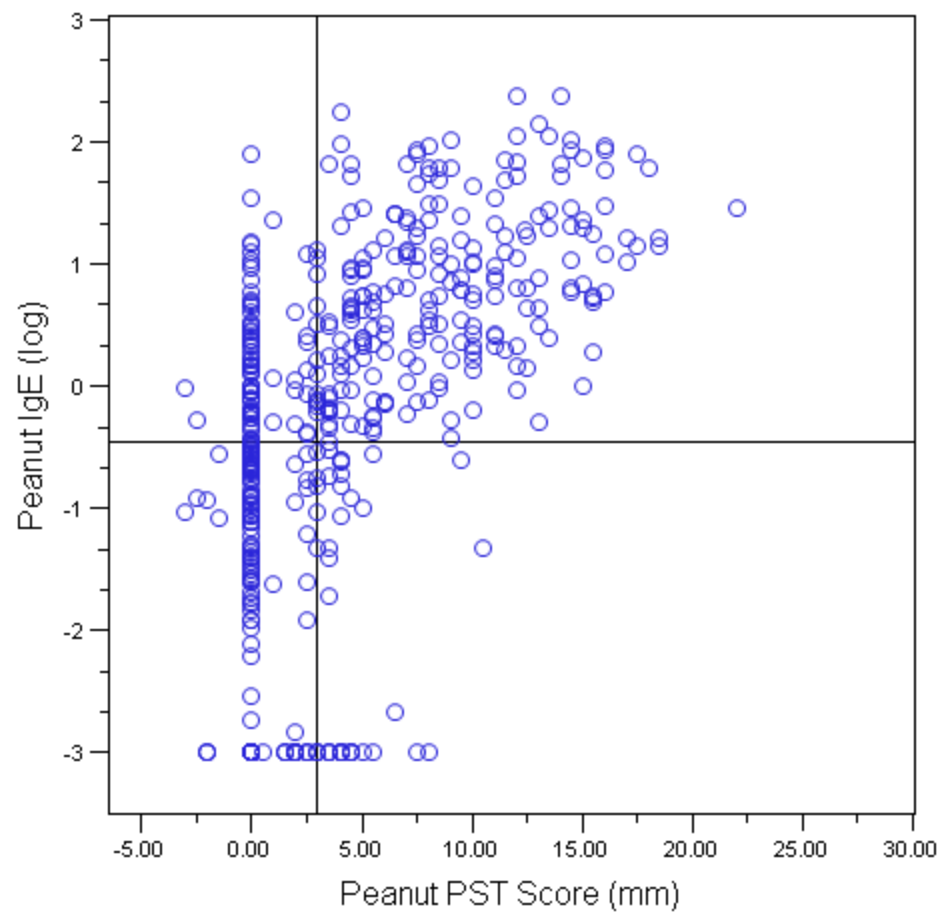

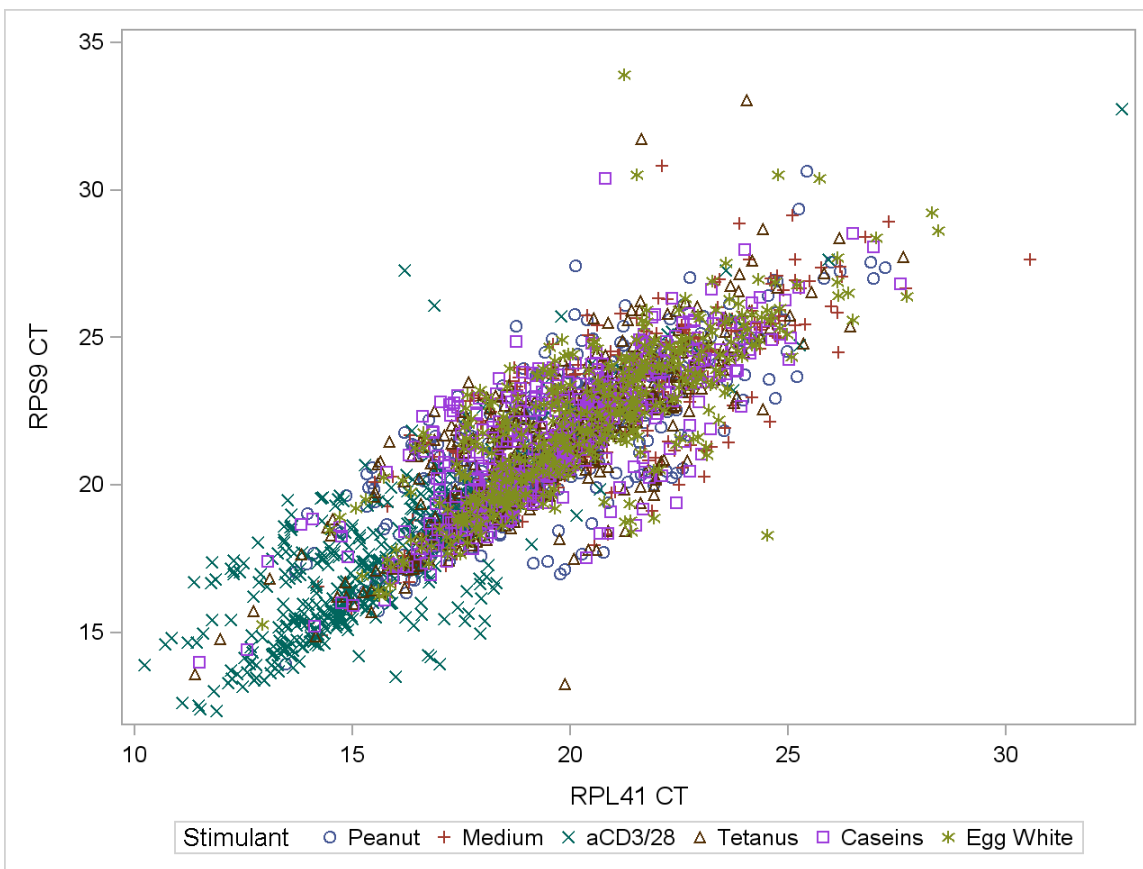

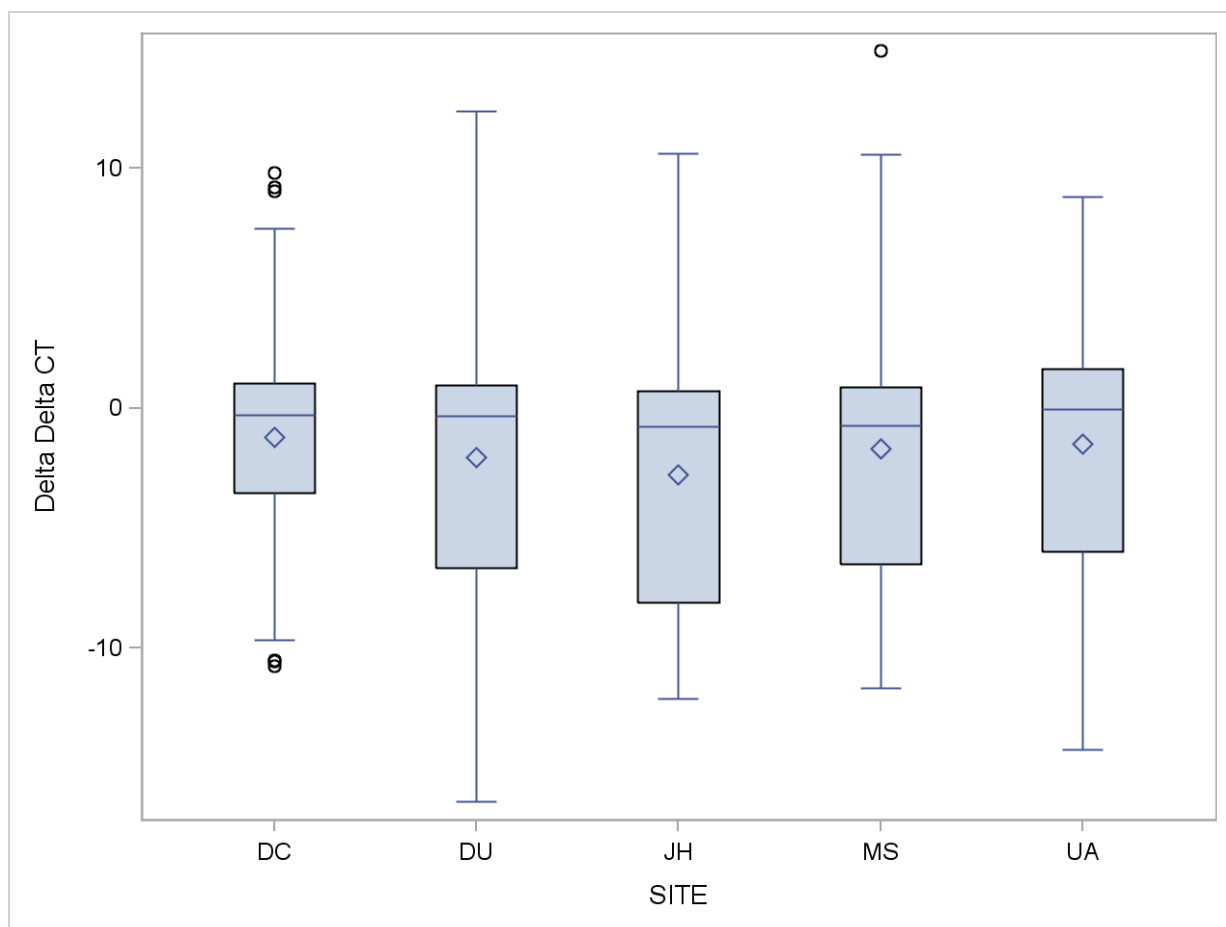

Supplement: NIHMS196592-supplement-01.pdf [file NIHMS196592-supplement-01.pdf]
